# Supplementary material
Source: publisher figshare collection journal article supplement (https://acs.figshare.com/ndownloader/files/29126264)
Supplement: Supplementary file 1 [file 29126264]

# Supporting Information

## All-Cellulose Paper with High Optical Transmittance and Haze Fabricated via Electrophoretic Deposition

*Junyoung Kim<sup>1</sup>, Uiseok Hwang<sup>2</sup>, Na-Yeon Kim<sup>1</sup>, Kisuk Cho<sup>2</sup>, June-Young Chung<sup>2</sup>, In-Kyung*

*Park<sup>2</sup>, Jonghwan Suhr<sup>2, 3</sup>, Taesung Kim<sup>3</sup>, and Jae-Do Nam<sup>1, 2, \*</sup>*

<sup>1</sup>Department of Energy Science, Sungkyunkwan University, Suwon 16419, Republic of Korea

<sup>2</sup>Department of Polymer Science and Engineering, Sungkyunkwan University, Suwon 16419,  
Republic of Korea

<sup>3</sup> Department of Mechanical Engineering, Sungkyunkwan University, Suwon 16419, Republic of  
Korea

Number of pages: 5

Number of figures: 5

Number of tables: 3

\*E-mail address of the corresponding author: jdnam@skku.edu

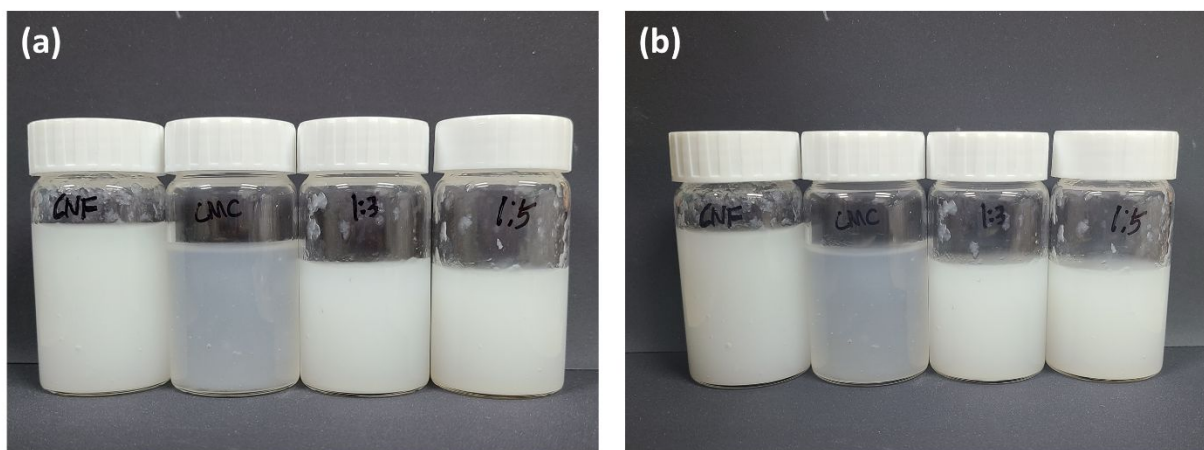

**Figure S1** (a) Digital images of CNF, CMC, CNF/CMC3, CNF/CMC5 dispersions at pH 8.0 taken right after prepared and (b) taken after 24 h, showing no difference.

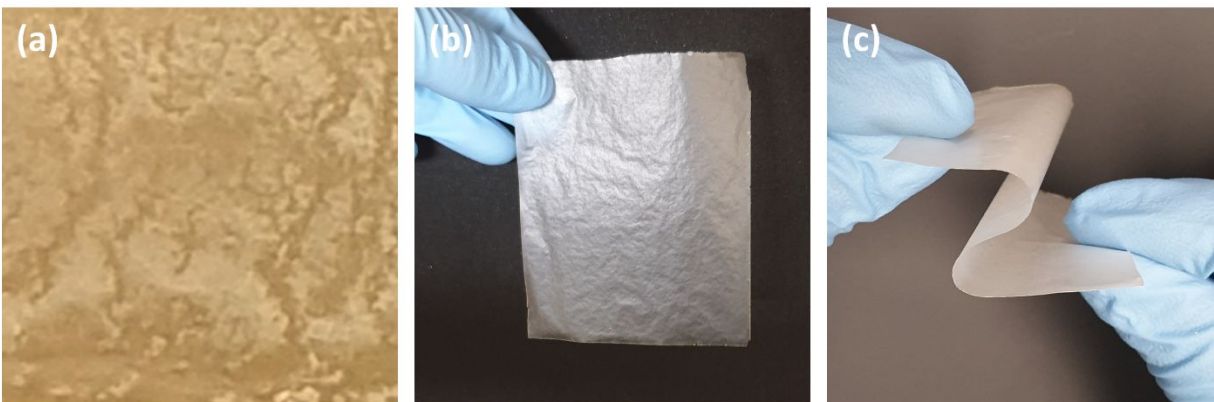

**Figure S2** (a) Enlarged image of CNF deposited electrode showing many cracks. (b) Self-standing CMC paper. (c) Flexible CNF/CMC3 paper.

**Table S1** Optical properties of CNF/CMC3 and CNF/CMC5 paper depending on sonication time.

| Sonication<br>time (h) | CNF/CMC3 paper    |          | CNF/CMC5 paper    |          |
|------------------------|-------------------|----------|-------------------|----------|
|                        | Transmittance (%) | Haze (%) | Transmittance (%) | Haze (%) |
| 1                      | 92.41             | 77.78    | 85.22             | 89.16    |
| 3                      | 93.43             | 72.31    | 89.74             | 85.44    |
| 6                      | 94.44             | 69.81    | 92.45             | 85.22    |
| 12                     | 95.50             | 61.02    | 95.00             | 79.88    |

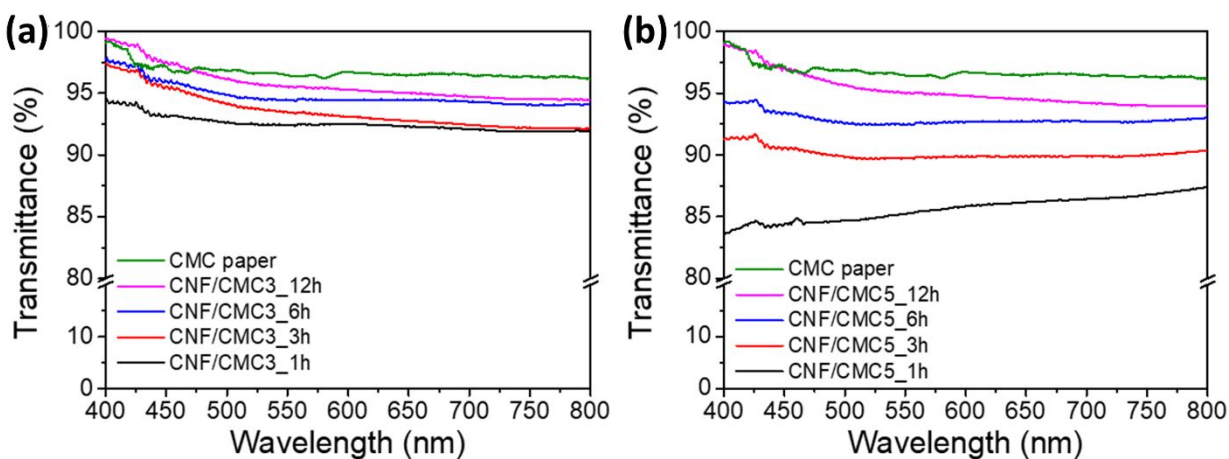

**Figure S3** (a) Light transmittance of the CMC paper and CNF/CMC3 papers, and (b) CNF/CMC5 papers in the wavelength range of 400-800 nm.

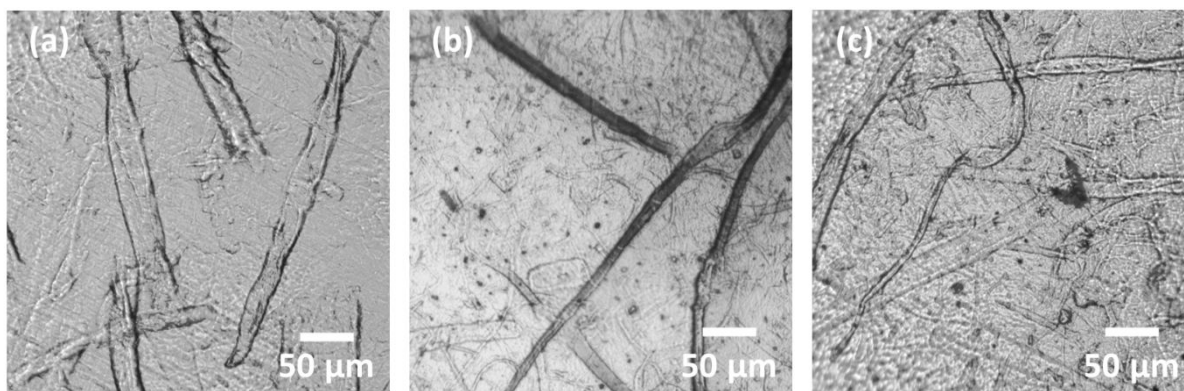

**Figure S4** (a) Optical microscope images of CMC, (b) CNF/CMC3\_1h, and (c) CNF/CMC5\_1h papers, respectively.

**Table S2**  $\Phi_T$  and  $\Phi_H$  values of CNF/CMC3 and CNF/CMC5 papers.

| Sonication<br>time (h) | CNF/CMC3 paper               |                              | CNF/CMC5 paper               |                              |
|------------------------|------------------------------|------------------------------|------------------------------|------------------------------|
|                        | $\Phi_T$ (%/ $\mu\text{m}$ ) | $\Phi_H$ (%/ $\mu\text{m}$ ) | $\Phi_T$ (%/ $\mu\text{m}$ ) | $\Phi_H$ (%/ $\mu\text{m}$ ) |
| 1                      | 9.241                        | 7.778                        | 8.522                        | 8.916                        |
| 3                      | 9.343                        | 7.231                        | 8.974                        | 8.544                        |
| 6                      | 9.444                        | 6.981                        | 9.245                        | 8.522                        |
| 12                     | 9.550                        | 6.102                        | 9.500                        | 7.988                        |

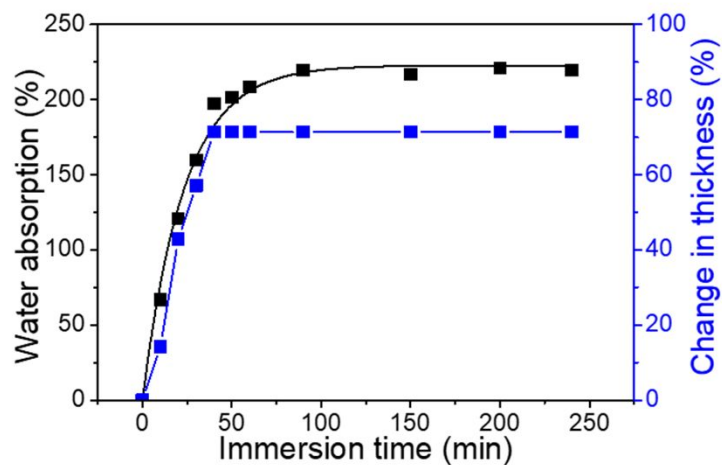

**Figure S5** Water absorption and thickness change of CNF/CMC3 paper as a function of immersion time.

**Table S3** BoxLucas1 fitting results for the time-dependent water absorption of CNF/CMC3 and CNF/CMC5 papers.

|                | $a$ (%)  | $b$ (min <sup>-1</sup> ) | $R^2$  |
|----------------|----------|--------------------------|--------|
| CNF/CMC3 paper | 222.7356 | 0.04286                  | 0.9905 |
| CNF/CMC5 paper | 77.3789  | 0.0506                   | 0.9801 |
